# Supplementary material
Source: PubMed Central journal article supplement (PMC7245018)
Supplement: NIHMS1527232-supplement-MMC2.pdf [file NIHMS1527232-supplement-MMC2.pdf]

**Methods S1. The DNA sequence of the *hbl-1(ma430)* allele. Related to STAR methods.**

The *ma430* allele contains the following DNA sequence (underlined) inserted in-frame with the *hbl-1* coding sequence, after the last amino acid coding codon (CAA, bold) and before the stop codon (TAA, bold). Nucleotides shown in small case encode a flexible linker, 3x(GGGS). The PAM (GG) recognized by the *hbl-1* sgRNA (expressed by pOI89) is also underlined.

```
<...CCACATGTACCAAGCCAGACACCAActctggaggtggatctggaggtggatctggaggtggatctGTCAG  
CAAGGGAGAGGCAGTTATCAAGGAGTTCATGCGTTTCAAGGTCCACATGGAGGGAT  
CCATGAACGGACACGAGTTCGAGATCGAGGGAGAGGGAGAGGGACGTCCATACGA  
GGGAACCCAAACCGCCAAGCTCAAGGTCACCAAGGGAGGACCACTCCCATTCTCCT  
GGGACATCCTCTCCCCACAATTCATGTACGGATCCCGTGCCTTCATCAAGCACCCAG  
CCGACATCCCAGACTACTACAAGCAATCCTTCCCAGAGGGATTCAAGTGGGAGCGT  
GTCATGAACTTCGAGGACGGAGGAGCCGTCACCGTCACCCAAGACACCTCCCTCGA  
GGACGGAACCCTCATCTACAAGGTCAAGCTCCGTGGAACCAACTTCCCACCAGACG  
GACCAGTCATGCAAAAGAAGACCATGGGATGGGAGGCCTCCACCGAGCGTCTCTAC  
CCAGAGGACGGAGTCCTCAAGGGAGACATCAAGATGGCCCTCCGTCTCAAGGACGG  
AGGACGTTACCTCGCCGACTTCAAGACCACCTACAAGGCCAAGAAGCCAGTCCAAA  
TGCCAGGAGCCTACAACGTCGACCGTAAGCTCGACATCACCTCCCACAACGAGGAC  
TACACCGTCGTGAGCAATACGAGCGTTCCGAGGGACGTCACTCCACCGGAGGAAT  
GGACGAGCTCTACAAGTAATGAGGACGTCTCCTCGTTAAGGAA...>
```
